# Supplementary material for: Glucose oxidase intercalation into polydopamine and ZIF-8 as a highly efficient and stable bio-catalyst for H2O2 production
Source: Royal Society of Chemistry journal article supplement (doi:10.1039/d4nj03303e), 2024-01-01
Supplement: d4nj03303e1.pdf [file d4nj03303e1.pdf]

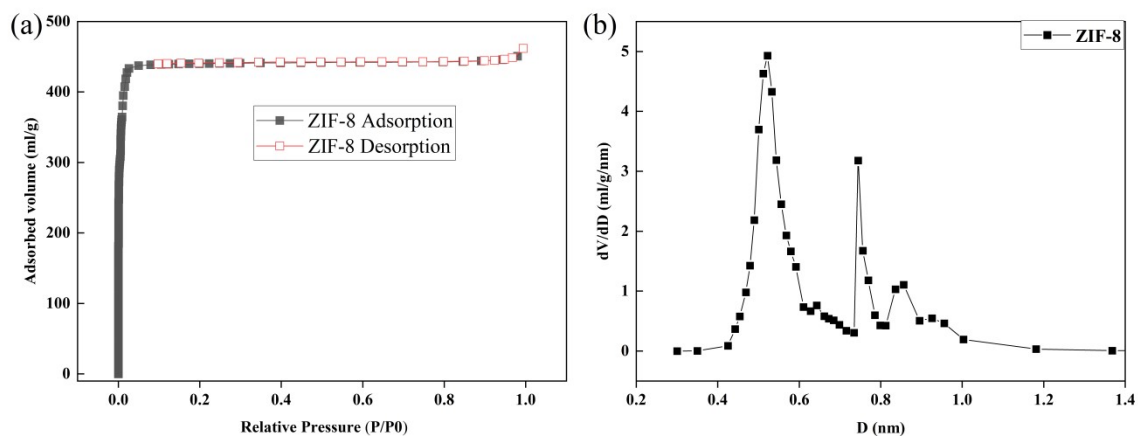

**Fig. S1.** shows this. (a)  $N_2$  adsorption/desorption isotherms of ZIF-8 and (b) pore size distributions of ZIF-8.

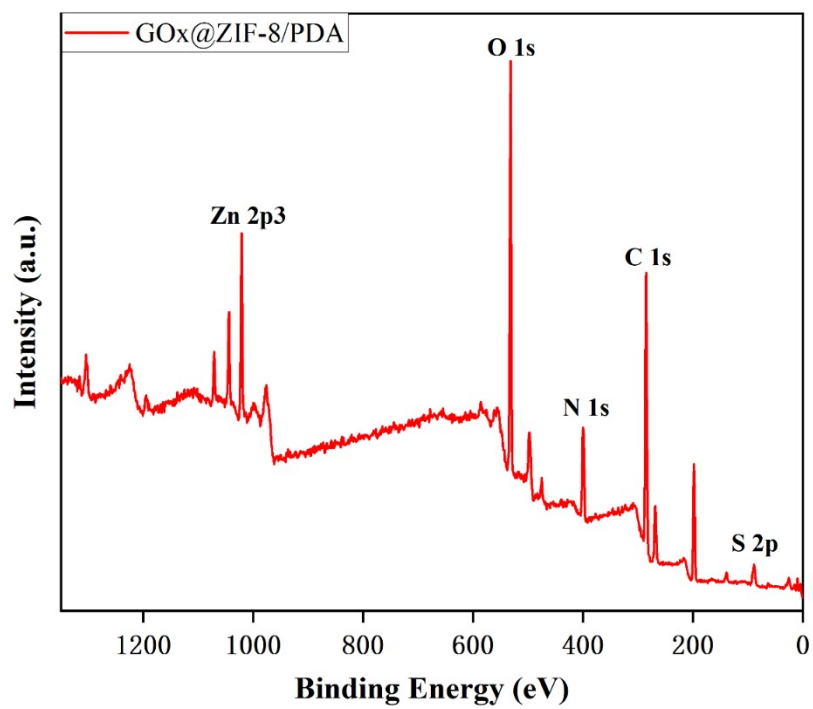

**Fig. S2.** General XPS drawing for GOx@ZIF-8/PDA

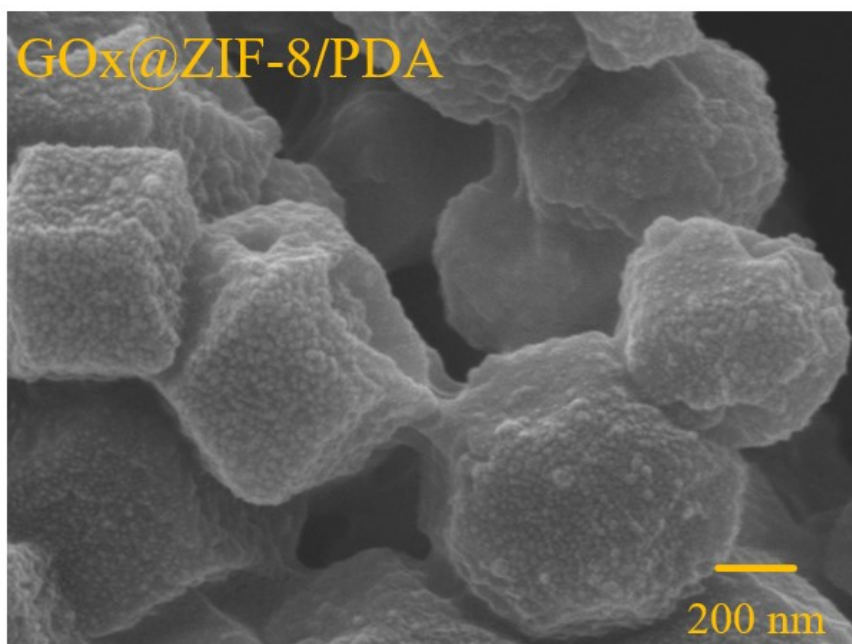

**Fig. S3.** SEM image of GOx@ZIF-8/PDA after three times of reuse.
